# Supplementary material
Source: Springer Nature journal article supplement (https://www.springermedizin.de/resource/supplementary/12887_2013_877_MOESM2_ESM.pdf/9475980)

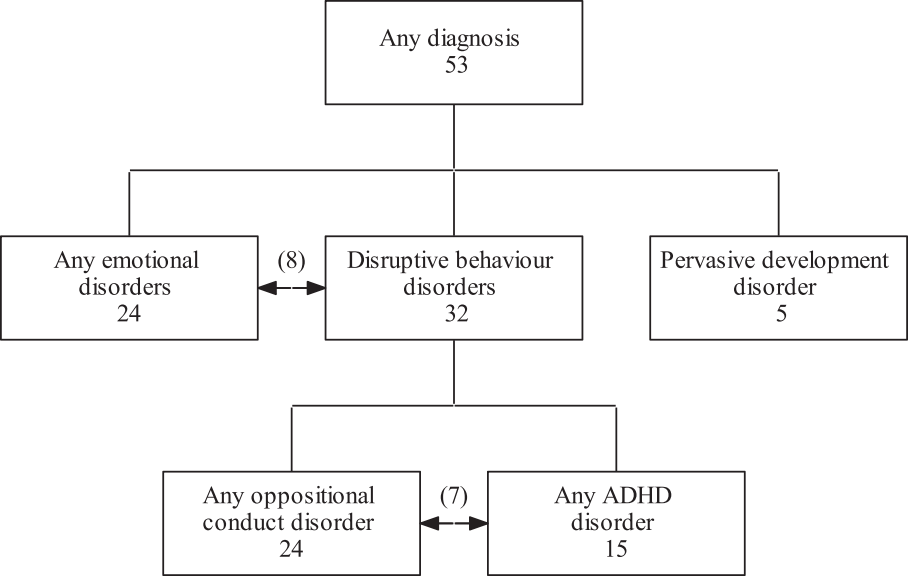

Supplement: MOESM2 [file 9475980]
